# Supplementary material for: MicroRNA-mediated epigenetic targeting of Survivin significantly enhances the antitumor activity of paclitaxel against non-small cell lung cancer
Source: PubMed Central journal article supplement (PMC5122342; doi:10.18632/oncotarget.9264), 2016-05-10
Supplement: oncotarget-07-37693-s001.pdf [file oncotarget-07-37693-s001.pdf]

# MicroRNA-mediated epigenetic targeting of Survivin significantly enhances the antitumor activity of paclitaxel against non-small cell lung cancer

## Supplementary Materials

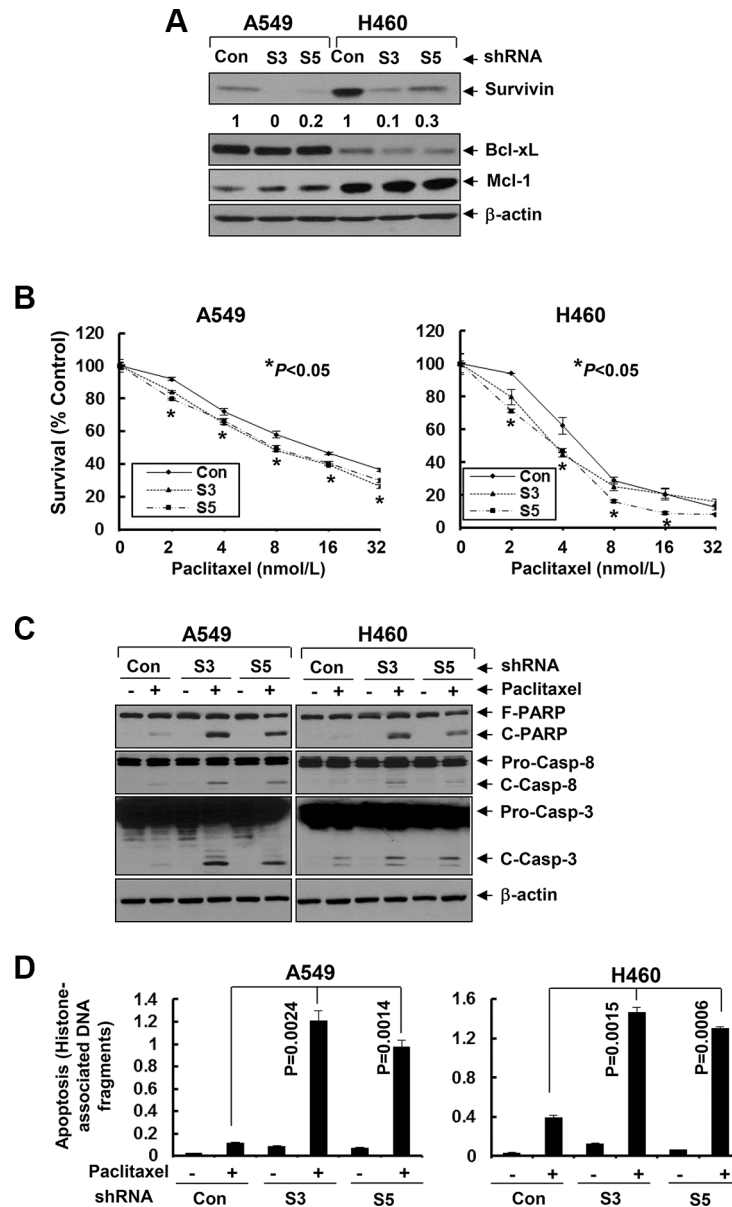

**Supplementary Figure S1: Specific knockdown of Survivin expression sensitizes NSCLC cells to paclitaxel-induced growth inhibition and apoptosis.** A549 and H460 cells infected with lentivirus containing either control shRNA (Con) or Survivin shRNA (S3 and S5) for 24 h were subjected to the following experiments. (A) Western blot analyses of Survivin, Bcl-xL, Mcl-1, or β-actin. The densitometry analyses of Survivin signals were shown underneath. The arbitrary numbers indicate the intensities of each cell line relative to controls, defined as 1.0. (B) Cell proliferation (MTS) assays were performed to determine the percentages of surviving cells upon paclitaxel treatment from each cell line relative to controls, defined as 100% survival. Data shows the representative of three independent experiments. Bars, S.D. (C and D) The cells untreated or treated with paclitaxel (6 nmol/L and 3 nmol/L for A549 and H460, respectively) for additional 24 h were collected and subjected to western blot analyses of PARP, caspase-8, caspase-3, or β-actin (C) or apoptotic-ELISA (D).

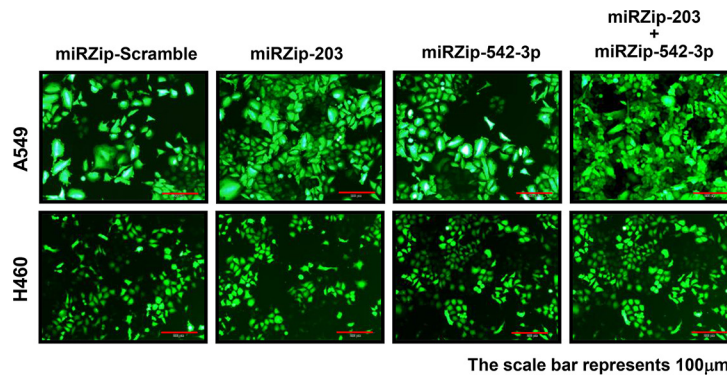

**Supplementary Figure S2: Transfection efficiency of A549 and H460 cells with a lentiviral miRZip™ system is determined by GFP expression.** A549 and H460 cells were either infected with a GFP-containing lentiviral miRZip™ expression system consisting of either scramble control, or miRZip-203, or miRZip-542-3p, or co-infected with both miRZip-203 and miRZip-542-3p lentiviral miRZip™ expression system. After 24 h, all infected cells were subjected to selection with Puromycin (1  $\mu$ g/mL) for two weeks and then visualized under a fluorescence microscope.

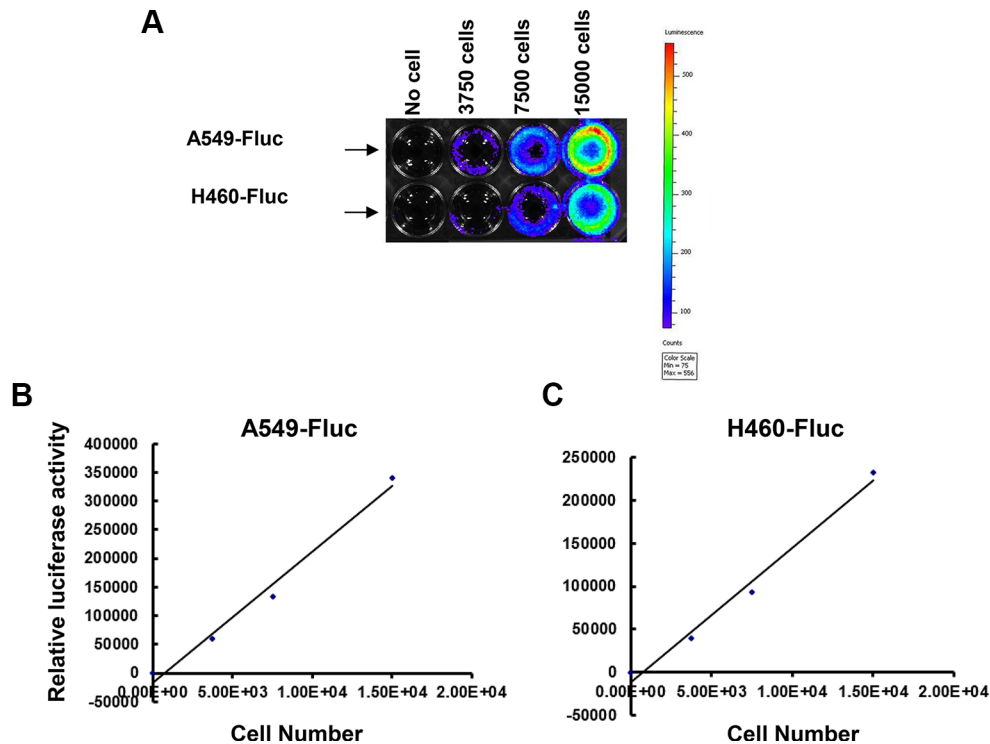

**Supplementary Figure S3: A linear correlation between the luciferase activity and seeded numbers of firefly luciferase-labeled A549 (A549-Fluc) or H460 (H460-Fluc) cells is observed.** (A) Different numbers of A549-Fluc or H460-Fluc cells ranging from 0 to  $1.5 \times 10^4$  were planted onto 12-well plates for 24 h and then subjected to bioluminescence imaging assay using IVIS200 instrument. (B and C) The linear correlation between relative luciferase activity and cell numbers was determined by curve fitting analysis.

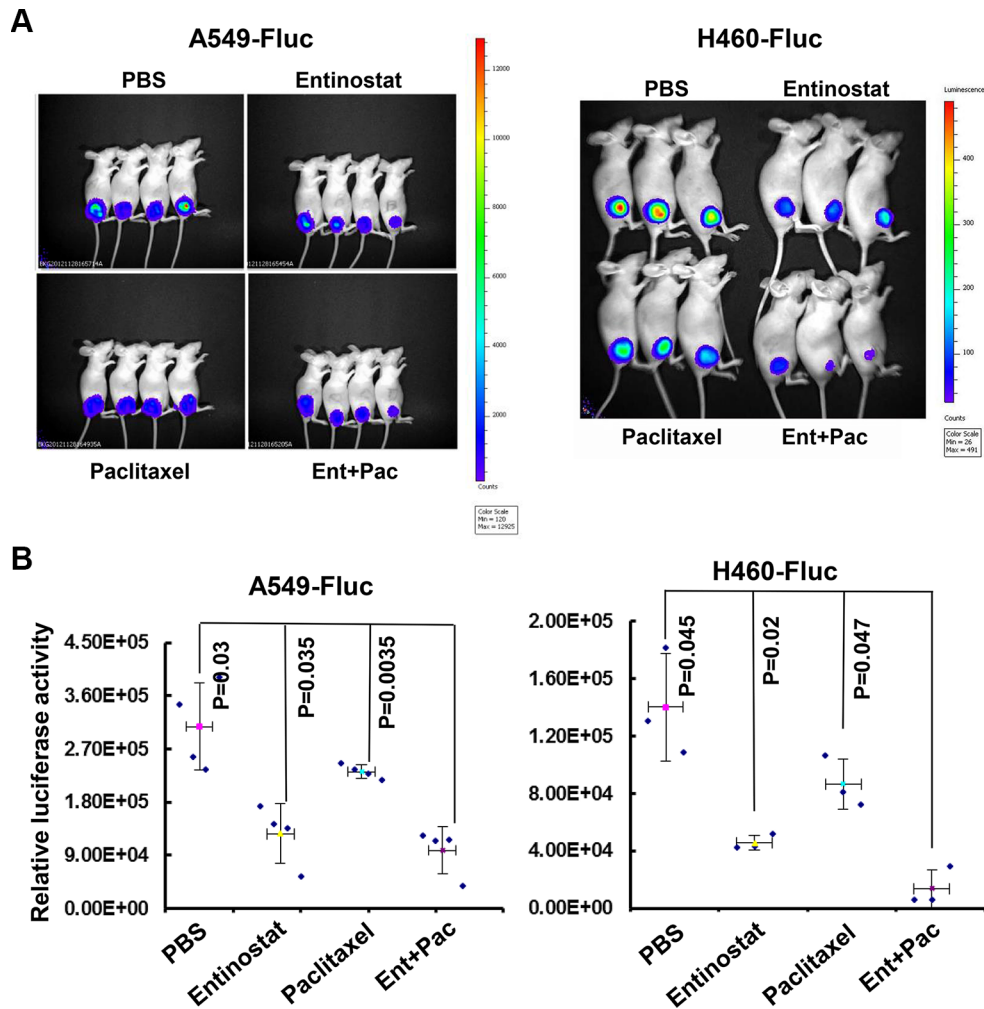

**Supplementary Figure S4: *In vivo* tumor growth of NSCLC cells following treatment with entinostat and/or paclitaxel is analyzed by bioluminescence imaging (related to Figure 7).** The tumor-bearing mice received intraperitoneal injections of either PBS, or entinostat or paclitaxel alone, or both entinostat and paclitaxel as described in the legends of Figure 7. After five treatments, all mice were subjected to bioluminescence imaging. **(A)** Representative images of tumor-bearing mice were shown. **(B)** The relative luciferase activity in mice treated with combinations of entinostat and paclitaxel was significantly lower than that in mice treated with P BS, or entinostat, or paclitaxel. The luciferase activity was obtained according to the proton reading by IVIS200.

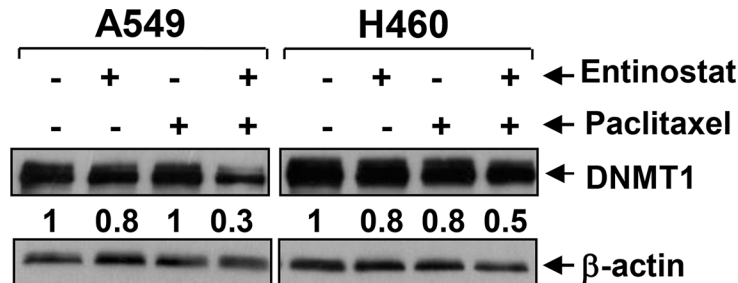

**Supplementary Figure S5: Entinostat and/or paclitaxel reduce the expression levels of DNMT1 in NSCLC cells *in vitro* (related to Figure 9).** A549 and H460 cells were treated with either entinostat (3 μmol/L for A549 and 0.5 μmol/L for H460), or paclitaxel (6 nmol/L and 3 nmol/L for A549 and H460, respectively) alone, or combinations of entinostat and paclitaxel for 24 h. Cells were collected and subjected to western blot analyses with specific antibodies directed against DNMT1 or β-actin. The densitometry analyses of DNMT1 signals were shown underneath, and the arbitrary numbers indicated the intensities of each cell line relative to controls, defined as 1.0.

**Supplementary Table S1: Primers used for PCR analyses**

| Name            | Sequence (5' - 3')            | Amplicon (bp) | Annealing temp (°C) |
|-----------------|-------------------------------|---------------|---------------------|
| <b>qRT-PCR</b>  |                               |               |                     |
| <i>β-actin</i>  | F: AGAGCTA CGAGCTGCCTGAC      | 184           | 57                  |
|                 | R: AGCACTGTGTTGGCGTACAG       |               |                     |
| <i>Survivin</i> | F: CCACCGCATCTCTACATTCA       | 184           | 57                  |
|                 | R: TATGTTCCCTCTATGGGGTCG      |               |                     |
| <i>Bcl-xL</i>   | F: GTAAACTGGGGTCGCATTGT       | 198           | 57                  |
|                 | R: TGCTGCATTGTTCCCATAGA       |               |                     |
| <i>Mcl-1</i>    | F: GACGAGTTGTACCGGCAGTC       | 197           | 57                  |
|                 | R: ATGTCCAGTTTCCGAAGCAT       |               |                     |
| <b>MSP</b>      |                               |               |                     |
| <i>miR-203</i>  | F: GAGTATTTTCGGTTTAGACGAGAC   | 300           | 58                  |
| <i>miR-203</i>  | R: CCTTTTATACGACGCAACCG       |               |                     |
| <b>USP</b>      |                               |               |                     |
| <i>miR-203</i>  | F: TTTGAGTATTTTGGTTTAGATGAGAT | 300           | 58                  |
| <i>miR-203</i>  | R: AACACCTTTTATACAACAACCA     |               |                     |

**Supplementary Table S2: Clinical characteristics of 20 patients with NSCLC, related to Figure 11**

|                  |              |         |
|------------------|--------------|---------|
| <b>Age</b>       |              |         |
|                  | Range        | 42–72   |
|                  | Mean         | 57.2    |
| <b>Sex</b>       | <b>n (%)</b> |         |
|                  | Female       | 6 (30)  |
|                  | Male         | 14 (70) |
| <b>TNM stage</b> | <b>n (%)</b> |         |
|                  | T1           | 10 (50) |
|                  | T2           | 6 (30)  |
|                  | T3           | 4 (20)  |

**Supplementary Table S3: Clinical information of 20 patients with NSCLC, related to Figure 11**

| Patient | Age | Gender | TNM Stage | Tumor Histology Type    |
|---------|-----|--------|-----------|-------------------------|
| 1       | 57  | M      | III       | Large cell carcinoma    |
| 2       | 72  | M      | IIa       | Adenocarcinoma          |
| 3       | 56  | M      | IIb       | Adenocarcinoma          |
| 4       | 54  | M      | Ib        | Squamous cell carcinoma |
| 5       | 46  | F      | IIb       | Adenocarcinoma          |
| 6       | 49  | M      | III       | Squamous cell carcinoma |
| 7       | 68  | M      | IIa       | Squamous cell carcinoma |
| 8       | 47  | F      | Ia        | Adenocarcinoma          |
| 9       | 56  | F      | Ia        | Squamous cell carcinoma |
| 10      | 61  | F      | II        | Adenocarcinoma          |
| 11      | 54  | M      | Ib        | Squamous cell carcinoma |

|    |    |   |     |                         |
|----|----|---|-----|-------------------------|
| 12 | 42 | M | Ia  | Squamous cell carcinoma |
| 13 | 48 | M | Ib  | Adenocarcinoma          |
| 14 | 65 | M | Ia  | Adenocarcinoma          |
| 15 | 54 | M | Ib  | Squamous cell carcinoma |
| 16 | 55 | M | III | Squamous cell carcinoma |
| 17 | 69 | F | Ia  | Adenocarcinoma          |
| 18 | 72 | M | Ib  | Squamous cell carcinoma |
| 19 | 64 | M | IIb | Adenocarcinoma          |
| 20 | 55 | F | III | Squamous cell carcinoma |

F: female; M: male; TNM: TNM-classification.

**Supplementary Table S4: Clinical characteristics of 61 patients with NSCLC, related to Figure 10**

|                              |                                         |           |
|------------------------------|-----------------------------------------|-----------|
| <b>Age</b>                   |                                         |           |
|                              | Range                                   | 23–76     |
|                              | Mean                                    | 57.2      |
| <b>Sex</b>                   | <b>n (%)</b>                            |           |
|                              | Female                                  | 30 (49.2) |
|                              | Male                                    | 31 (50.8) |
| <b>TNM stage</b>             | <b>n (%)</b>                            |           |
|                              | T1                                      | 31 (50.8) |
|                              | T2                                      | 25 (41)   |
|                              | T3                                      | 5 (8.2)   |
| <b>IHC Positive Staining</b> | <b>n (%)</b>                            |           |
|                              | DNMT1 in NSCLC                          | 29 (47.5) |
|                              | DNMT1 in normal adjacent lung tissue    | 22 (36)   |
|                              | Survivin in NSCLC                       | 29 (47.5) |
|                              | Survivin in normal adjacent lung tissue | 23 (37.7) |

**Supplementary Table S5: Clinical information of 61 patients with NSCLC, related to Figure 10**

| Patient | Age | Gender | TNM Stage | Tumor Histology Type | DNMT1 IHC-T | DNMT1 IHC-N | Survivin IHC-T | Survivin IHC-N |
|---------|-----|--------|-----------|----------------------|-------------|-------------|----------------|----------------|
| 1       | 71  | M      | III       | Adenocarcinoma       | 2           | 0           | 2              | 0              |
| 2       | 45  | F      | IIa       | Adenocarcinoma       | 0           | 0           | 0              | 0              |
| 3       | 47  | F      | Ia        | Adenocarcinoma       | 1           | 1           | 1              | 1              |
| 4       | 33  | F      | II        | Adenocarcinoma       | 0           | 0           | 0              | 0              |
| 5       | 38  | F      | Ia        | Adenocarcinoma       | 1           | 0           | 1              | 0              |
| 6       | 55  | M      | III       | Adenocarcinoma       | 2           | 1           | 3              | 1              |
| 7       | 76  | M      | Ia        | Adenocarcinoma       | 0           | 0           | 0              | 0              |
| 8       | 58  | M      | IIb       | Adenocarcinoma       | 3           | 0           | 3              | 0              |
| 9       | 43  | F      | Ib        | Adenocarcinoma       | 0           | 0           | 0              | 0              |
| 10      | 61  | M      | IIa       | Adenocarcinoma       | 0           | 0           | 0              | 0              |
| 11      | 65  | M      | IIa       | Adenocarcinoma       | 0           | 0           | 0              | 0              |
| 12      | 46  | F      | Ia        | Adenocarcinoma       | 0           | 0           | 0              | 0              |
| 13      | 59  | M      | Ia        | Adenocarcinoma       | 2           | 1           | 1              | 1              |

|    |    |   |     |                |   |   |   |   |
|----|----|---|-----|----------------|---|---|---|---|
| 14 | 60 | F | IIb | Adenocarcinoma | 2 | 0 | 2 | 0 |
| 15 | 61 | M | Ib  | Adenocarcinoma | 0 | 0 | 0 | 0 |
| 16 | 49 | M | Ia  | Adenocarcinoma | 1 | 0 | 1 | 0 |
| 17 | 75 | M | IIa | Adenocarcinoma | 2 | 2 | 1 | 2 |
| 18 | 68 | F | II  | Adenocarcinoma | 1 | 1 | 1 | 1 |
| 19 | 65 | M | Ia  | Adenocarcinoma | 0 | 1 | 0 | 1 |
| 20 | 54 | F | IIb | Adenocarcinoma | 0 | 0 | 0 | 0 |
| 21 | 66 | M | Ib  | Adenocarcinoma | 2 | 1 | 2 | 1 |
| 22 | 51 | F | II  | Adenocarcinoma | 1 | 2 | 2 | 2 |
| 23 | 54 | F | II  | Adenocarcinoma | 0 | 0 | 0 | 0 |
| 24 | 67 | F | I   | Adenocarcinoma | 0 | 0 | 0 | 0 |
| 25 | 66 | M | I   | Adenocarcinoma | 0 | 0 | 0 | 0 |
| 26 | 72 | F | II  | Adenocarcinoma | 0 | 0 | 0 | 0 |
| 27 | 72 | M | IIa | Adenocarcinoma | 2 | 1 | 1 | 1 |
| 28 | 69 | M | II  | Adenocarcinoma | 0 | 0 | 0 | 0 |
| 29 | 42 | F | IIb | Adenocarcinoma | 2 | 1 | 2 | 1 |
| 30 | 71 | F | Ia  | Adenocarcinoma | 1 | 0 | 1 | 0 |
| 31 | 52 | M | Ib  | Adenocarcinoma | 0 | 1 | 0 | 1 |
| 32 | 52 | M | III | Adenocarcinoma | 3 | 0 | 3 | 0 |
| 33 | 62 | F | Ib  | Adenocarcinoma | 1 | 0 | 1 | 1 |
| 34 | 75 | M | IIa | Adenocarcinoma | 3 | 2 | 1 | 2 |
| 35 | 60 | M | Ib  | Adenocarcinoma | 2 | 1 | 2 | 1 |
| 36 | 23 | F | IIb | Adenocarcinoma | 0 | 0 | 0 | 0 |
| 37 | 66 | F | Ib  | Adenocarcinoma | 0 | 0 | 0 | 0 |
| 38 | 74 | M | Ia  | Adenocarcinoma | 1 | 0 | 1 | 0 |
| 39 | 75 | M | IIa | Adenocarcinoma | 0 | 2 | 0 | 2 |
| 40 | 59 | F | Ia  | Adenocarcinoma | 0 | 0 | 0 | 0 |
| 41 | 46 | F | Ib  | Adenocarcinoma | 1 | 0 | 1 | 0 |
| 42 | 53 | M | Ia  | Adenocarcinoma | 2 | 1 | 2 | 1 |
| 43 | 41 | F | Ia  | Adenocarcinoma | 0 | 0 | 0 | 0 |
| 44 | 53 | M | IIa | Adenocarcinoma | 3 | 1 | 2 | 1 |
| 45 | 49 | F | Ib  | Adenocarcinoma | 0 | 0 | 0 | 0 |
| 46 | 39 | M | III | Adenocarcinoma | 0 | 0 | 0 | 0 |
| 47 | 74 | M | III | Adenocarcinoma | 0 | 0 | 0 | 0 |
| 48 | 47 | F | Ia  | Adenocarcinoma | 0 | 0 | 0 | 0 |
| 49 | 60 | F | IIb | Adenocarcinoma | 0 | 0 | 0 | 0 |
| 50 | 55 | F | III | Adenocarcinoma | 0 | 0 | 0 | 0 |
| 51 | 55 | F | Ia  | Adenocarcinoma | 1 | 1 | 1 | 1 |
| 52 | 46 | M | IIa | Adenocarcinoma | 2 | 2 | 2 | 2 |
| 53 | 43 | M | I   | Adenocarcinoma | 0 | 0 | 0 | 0 |
| 54 | 56 | M | IIa | Adenocarcinoma | 2 | 2 | 2 | 2 |
| 55 | 45 | F | IIa | Adenocarcinoma | 0 | 0 | 0 | 0 |
| 56 | 68 | M | IIa | Adenocarcinoma | 1 | 1 | 1 | 1 |
| 57 | 72 | M | IIa | Adenocarcinoma | 1 | 2 | 1 | 2 |
| 58 | 60 | F | Ib  | Adenocarcinoma | 0 | 1 | 0 | 1 |
| 59 | 49 | F | Ib  | Adenocarcinoma | 0 | 0 | 0 | 0 |

|           |    |   |     |                |   |   |   |   |
|-----------|----|---|-----|----------------|---|---|---|---|
| <b>60</b> | 52 | F | Ia  | Adenocarcinoma | 3 | 0 | 3 | 0 |
| <b>61</b> | 72 | M | IIa | Adenocarcinoma | 0 | 0 | 0 | 0 |

F: female; M: male; TNM: TNM-classification; IHC-T: immunohistochemistry-tumor; IHC-N: immunohistochemistry-normal adjacent tissue. For DNMT1 or Survivin IHC, stained slides were scored according to the percentage of cells with positive staining for each antigen (0: 0~4%; 1: 5%~25%; 2: 26%~50%; and 3:  $\geq$  51%).

**Supplementary Table S6: The spearman rank correlation between DNMT1 or Survivin and TNM stages, age, or gender of the patients with NSCLC, related to Figure 10**

|                           | TNM stages                              | Age                                           | Gender                                        |
|---------------------------|-----------------------------------------|-----------------------------------------------|-----------------------------------------------|
| <b>Tumor<br/>DNMT1</b>    | $r = 1$<br>$P < 0.0001$<br>( $n = 61$ ) | $r = 1$<br>$P < 0.0001$<br>( $n = 61$ )       | $r = 0.30175$<br>$P = 0.0181$<br>( $n = 61$ ) |
| <b>Tumor<br/>Survivin</b> | $r = 1$<br>$P < 0.0001$<br>( $n = 61$ ) | $r = 0.03068$<br>$P = 0.8144$<br>( $n = 61$ ) | $r = 0.24337$<br>$P = 0.0588$<br>( $n = 61$ ) |
